# Supplementary material for: Solubilization and photoinduced electron transfer of single-walled carbon nanotubes wrapped with coenzyme Q10
Source: Royal Society of Chemistry journal article supplement (doi:10.1039/b910080f), 2009-01-01
Supplement: b910080f.pdf [file b910080f.pdf]

Electronic Supplementary Information (ESI)

**Solubilization and Photoinduced Electron Transfer of Single-Walled Carbon Nanotubes Wrapped with Coenzyme Q<sub>10</sub>**

**Masataka Ohtani and Shunichi Fukuzumi\***

Department of Material and Life Science, Graduate School of Engineering, Osaka University, SORST, Japan Science and Technology Agency (JST), Suita, Osaka 565-0871, Japan

E-mail: fukuzumi@chem.eng.osaka-u.ac.jp

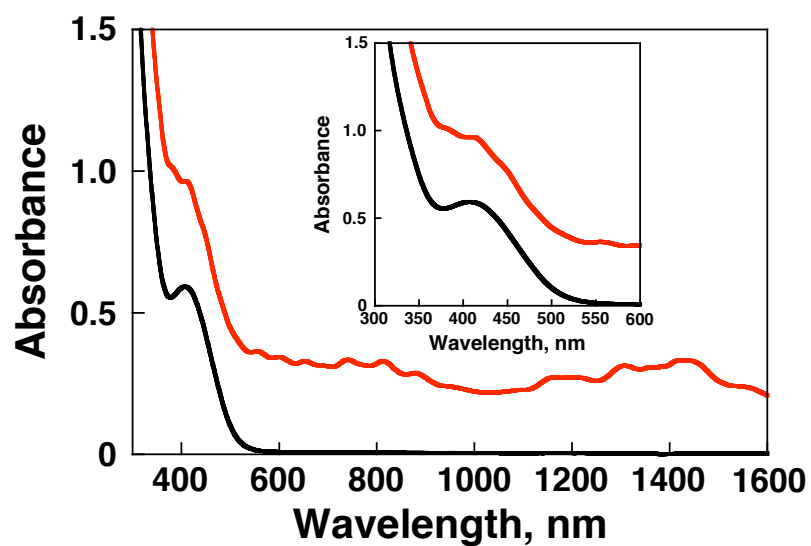

**Figure S1.** UV-Vis-NIR absorption spectra of SWNT-CoQ<sub>10</sub> (red line) and CoQ<sub>10</sub> (black line) in DMF. Inset: Magnification of UV-Vis region.

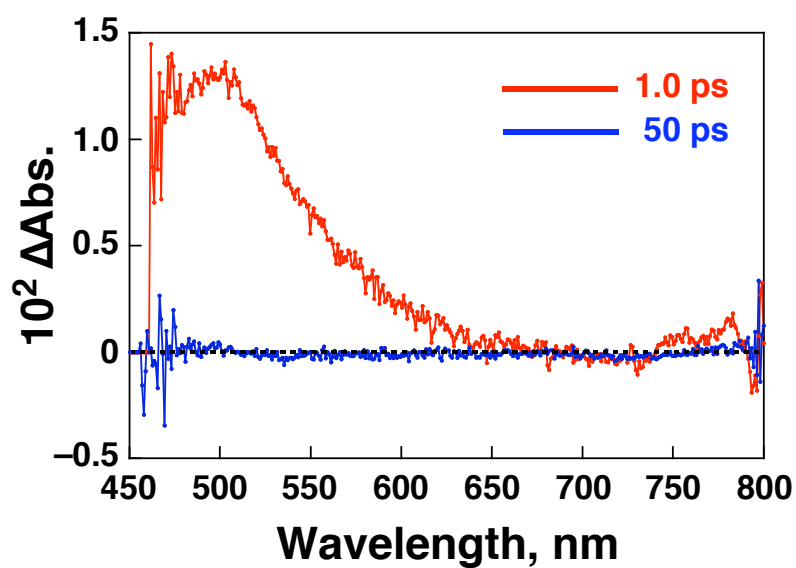

**Figure S2.** (a) Transient absorption spectra of  ${}^1\text{CoQ}_{10}^*$  in deaerated DMF at 298 K after laser excitation at 410 nm.

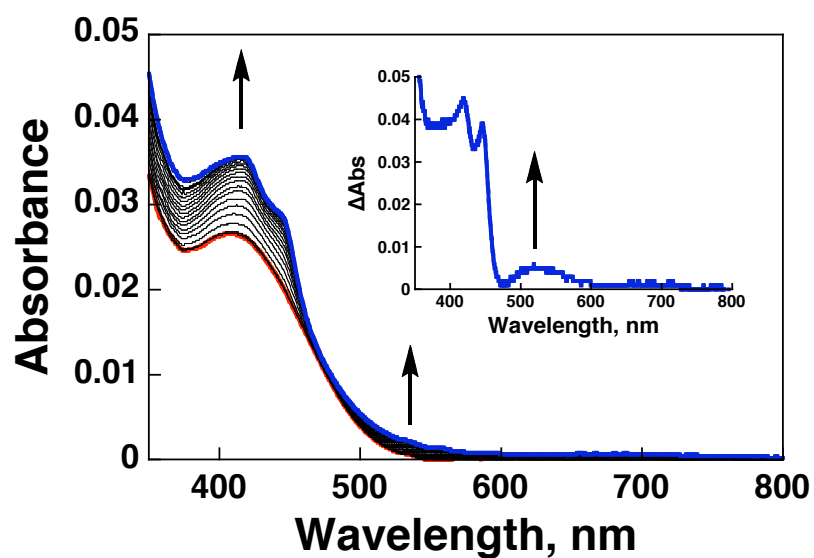

**Figure S3.** Spectroelectrochemistry of CoQ<sub>10</sub> in deaerated DMF (0.1 M supporting electrolyte: TBAPF<sub>6</sub>) with an applied potential at  $-0.68$  V vs SCE. Inset: Difference spectrum.

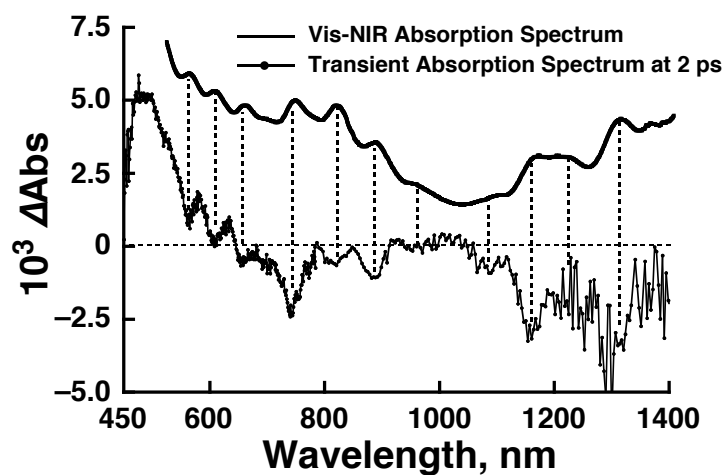

**Figure S4.** Transient absorption spectra of SWNT-CoQ<sub>10</sub> in deaerated DMF at 298 K taken at 2 ps after laser excitation at 410 nm. Solid line is an absorption spectrum of SWNT-CoQ<sub>10</sub> in DMF.
